# Supplementary material
Source: HighWire-hosted journal article supplement (https://mentalhealth.bmj.com/content/26/1/e300707)
Supplement: inline-supplementary-material-2 [file inline-supplementary-material-2.pdf]

| name      | type | node1       | node2       | value      | id                     |
|-----------|------|-------------|-------------|------------|------------------------|
| 26 sample | edge | nogood      | selfhate    | 0,22480989 | nogood--selfhate       |
| 55 sample | edge | lonl        | nolove      | 0,22118573 | lonl--nolove           |
| 65 sample | edge | lonl        | nogoodasoth | 0,18611845 | lonl--nogoodasoth      |
| 53 sample | edge | selfhate    | nolove      | 0,17724863 | selfhate--nolove       |
| 77 sample | edge | nolove      | evthwrong   | 0,16072755 | nolove--evthwrong      |
| 60 sample | edge | nogood      | nogoodasoth | 0,1497053  | nogood--nogoodasoth    |
| 63 sample | edge | selfhate    | nogoodasoth | 0,14668112 | selfhate--nogoodasoth  |
| 36 sample | edge | selfhate    | badpers     | 0,14189496 | selfhate--badpers      |
| 15 sample | edge | nogood      | cried       | 0,14080724 | nogood--cried          |
| 75 sample | edge | badpers     | evthwrong   | 0,13775396 | badpers--evthwrong     |
| 66 sample | edge | nolove      | nogoodasoth | 0,1345642  | nolove--nogoodasoth    |
| 11 sample | edge | miser       | cried       | 0,13306731 | miser--cried           |
| 18 sample | edge | tired       | concent     | 0,13227444 | tired--concent         |
| 7 sample  | edge | miser       | nogood      | 0,12890404 | miser--nogood          |
| 27 sample | edge | cried       | selfhate    | 0,12803168 | cried--selfhate        |
| 6 sample  | edge | tired       | restl       | 0,12739017 | tired--restl           |
| 78 sample | edge | nogoodasoth | evthwrong   | 0,11730272 | nogoodasoth--evthwrong |
| 19 sample | edge | restl       | concent     | 0,11403833 | restl--concent         |
| 8 sample  | edge | enjoy       | nogood      | 0,10972439 | enjoy--nogood          |
| 16 sample | edge | miser       | concent     | 0,10825946 | miser--concent         |
| 4 sample  | edge | miser       | restl       | 0,10033869 | miser--restl           |
| 1 sample  | edge | miser       | enjoy       | 0,10001212 | miser--enjoy           |
| 37 sample | edge | miser       | lonl        | 0,09885887 | miser--lonl            |
| 50 sample | edge | nogood      | nolove      | 0,09769992 | nogood--nolove         |
| 54 sample | edge | badpers     | nolove      | 0,08998731 | badpers--nolove        |
| 73 sample | edge | concent     | evthwrong   | 0,08850963 | concent--evthwrong     |
| 74 sample | edge | selfhate    | evthwrong   | 0,08649174 | selfhate--evthwrong    |
| 3 sample  | edge | enjoy       | tired       | 0,08520477 | enjoy--tired           |
| 68 sample | edge | enjoy       | evthwrong   | 0,08282756 | enjoy--evthwrong       |
| 71 sample | edge | nogood      | evthwrong   | 0,07616223 | nogood--evthwrong      |
| 32 sample | edge | restl       | badpers     | 0,07512444 | restl--badpers         |
| 76 sample | edge | lonl        | evthwrong   | 0,0737836  | lonl--evthwrong        |
| 17 sample | edge | enjoy       | concent     | 0,07044662 | enjoy--concent         |
| 51 sample | edge | cried       | nolove      | 0,0661843  | cried--nolove          |
| 43 sample | edge | concent     | lonl        | 0,06254894 | concent--lonl          |
| 72 sample | edge | cried       | evthwrong   | 0,05952991 | cried--evthwrong       |
| 10 sample | edge | restl       | nogood      | 0,05631535 | restl--nogood          |
| 39 sample | edge | tired       | lonl        | 0,05433273 | tired--lonl            |
| 44 sample | edge | selfhate    | lonl        | 0,05334935 | selfhate--lonl         |
| 64 sample | edge | badpers     | nogoodasoth | 0,05076705 | badpers--nogoodasoth   |
| 35 sample | edge | concent     | badpers     | 0,05039298 | concent--badpers       |
| 14 sample | edge | restl       | cried       | 0,04978316 | restl--cried           |
| 42 sample | edge | cried       | lonl        | 0,04784812 | cried--lonl            |
| 5 sample  | edge | enjoy       | restl       | 0,04396889 | enjoy--restl           |
| 62 sample | edge | concent     | nogoodasoth | 0,04324441 | concent--nogoodasoth   |
| 29 sample | edge | miser       | badpers     | 0,0427038  | miser--badpers         |
| 58 sample | edge | tired       | nogoodasoth | 0,04210059 | tired--nogoodasoth     |
| 40 sample | edge | restl       | lonl        | 0,04206362 | restl--lonl            |
| 2 sample  | edge | miser       | tired       | 0,04177953 | miser--tired           |

|           |      |         |             |             |                    |
|-----------|------|---------|-------------|-------------|--------------------|
| 23 sample | edge | enjoy   | selfhate    | 0,03987814  | enjoy--selfhate    |
| 59 sample | edge | restl   | nogoodasoth | 0,03737985  | restl--nogoodasoth |
| 56 sample | edge | miser   | nogoodasoth | 0,03654242  | miser--nogoodasoth |
| 21 sample | edge | cried   | concent     | 0,03628825  | cried--concent     |
| 69 sample | edge | tired   | evthwrong   | 0,03356827  | tired--evthwrong   |
| 9 sample  | edge | tired   | nogood      | 0,03113123  | tired--nogood      |
| 48 sample | edge | tired   | nolove      | 0,03078077  | tired--nolove      |
| 20 sample | edge | nogood  | concent     | 0,0304577   | nogood--concent    |
| 45 sample | edge | badpers | lonl        | 0,02932345  | badpers--lonl      |
| 24 sample | edge | tired   | selfhate    | 0,02790736  | tired--selfhate    |
| 70 sample | edge | restl   | evthwrong   | 0,02633294  | restl--evthwrong   |
| 28 sample | edge | concent | selfhate    | 0,02521691  | concent--selfhate  |
| 41 sample | edge | nogood  | lonl        | 0,02256809  | nogood--lonl       |
| 30 sample | edge | enjoy   | badpers     | 0,01694351  | enjoy--badpers     |
| 31 sample | edge | tired   | badpers     | 0,01674452  | tired--badpers     |
| 34 sample | edge | cried   | badpers     | 0,0165025   | cried--badpers     |
| 67 sample | edge | miser   | evthwrong   | 0,01572811  | miser--evthwrong   |
| 22 sample | edge | miser   | selfhate    | 0,01232956  | miser--selfhate    |
| 33 sample | edge | nogood  | badpers     | 0,01094399  | nogood--badpers    |
| 12 sample | edge | enjoy   | cried       | 0           | enjoy--cried       |
| 13 sample | edge | tired   | cried       | 0           | tired--cried       |
| 25 sample | edge | restl   | selfhate    | 0           | restl--selfhate    |
| 38 sample | edge | enjoy   | lonl        | 0           | enjoy--lonl        |
| 46 sample | edge | miser   | nolove      | 0           | miser--nolove      |
| 49 sample | edge | restl   | nolove      | 0           | restl--nolove      |
| 52 sample | edge | concent | nolove      | 0           | concent--nolove    |
| 57 sample | edge | enjoy   | nogoodasoth | 0           | enjoy--nogoodasoth |
| 47 sample | edge | enjoy   | nolove      | -0,01269081 | enjoy--nolove      |
| 61 sample | edge | cried   | nogoodasoth | -0,01570354 | cried--nogoodasoth |

This table depicts the edge weights of the two nodes as regularized partial correlations:

Tired = Felt tired; selfhate = I hated myself; restl = Restless;

no love = Nobody really loved me; nogoodasoth = Not as good as other kids;

nogood = I was no good anymore; miser = Miserable/unhappy; lonl = Felt lonely;

evthwrong = Did everything wrong; enjoy = Did not enjoy anything; cried = Cried a lot;

concent = Hard to concentrate; badpers = I was a bad person
